# Supplementary material
Source: publisher site journal article supplement (http://www.kjim.org/upload/media/kjim-2022-104-suppl5.pdf)

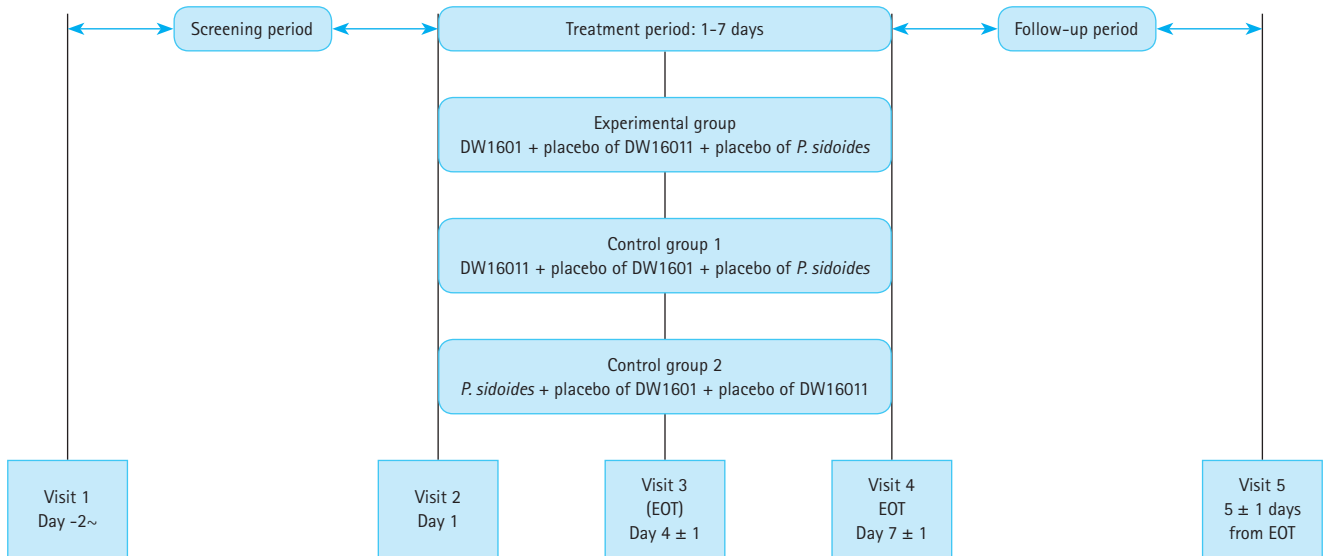

**Supplementary Figure 1.** Study protocol. *P. sidoides*, *Pelargonium sidoides*; EOT, end of treatment.

Supplement: Supplementary file 1 [file kjim-2022-104-suppl5.pdf]
